# Supplementary material for: The Gut Microbiome Is Associated with Clinical Response to Anti–PD-1/PD-L1 Immunotherapy in Gastrointestinal Cancer
Source: Oxford University Press journal article supplement (doi:10.1158/2326-6066.cir-19-1014), 2020-08-27
Supplement: 23266066cir191014-sup-234420_3_supp_6397122_qctf4f.xlsx [file 23266066cir191014-sup-234420_3_supp_6397122_qctf4f.xlsx]

## Sheet: S1_SampleUsed
Table S1. Fecal samples of patients used in this study.
Patient ID	Response status	16S Sequencing	Metagenome Sequencing	Predictive modeling
P1084352	R	✓	✓	✓
P1088182	R	✓
P1159173	R	✓	✓	✓
P1166728	NR	✓		✓
P1174666	NR	✓	✓	✓
P1244125	R	✓	✓	✓
P1245834	R	✓		✓
P1257568	R	✓
P1282199	NR	✓	✓	✓
P1287402	NR	✓	✓
P1306904	NR	✓	✓	✓
P1309619	R	✓		✓
P1310118	R	✓	✓	✓
P1311639	NR	✓
P1317685	NR	✓		✓
P1328193	R	✓		✓
P1333681	R	✓		✓
P1336362	R	✓		✓
P1348525	NR	✓	✓	✓
P1352784	R	✓	✓	✓
P1356452	R	✓	✓	✓
P1358328	NR	✓		✓
P1370428	R	✓	✓	✓
P1373860	R	✓		✓
P1375383	R	✓		✓
P1384070	NR	✓	✓	✓
P1384895	R	✓	✓	✓
P1391350	NR	✓	✓	✓
P1403382	R	✓	✓	✓
P1407120	R	✓	✓	✓
P1411993	R	✓
P1419250	NR	✓
P1419432	NR	✓	✓
P1422564	R	✓	✓	✓
P1425576	R	✓		✓
P1425900	R	✓
P1432745	R	✓	✓	✓
P1433357	R	✓	✓	✓
P1433595	R	✓	✓	✓
P1448606	NR	✓		✓
P1450110	NR	✓	✓	✓
P1453209	R	✓	✓	✓
P1453320	R	✓	✓	✓
P1456545	NR	✓		✓
P1459391	NR	✓		✓
P1464717	R	✓	✓	✓
P1472680	R	✓	✓	✓
P1480690	R	✓	✓	✓
P1481367	NR	✓	✓
P1486718	R	✓	✓	✓
P1488875	R	✓		✓
P1492612	NR	✓
P1494425	R	✓	✓	✓
P1504288	NR	✓		✓
P1504342	R	✓	✓	✓
P1504421	R	✓	✓	✓
P1504482	R	✓		✓
P1504669	R	✓		✓
P1505170	R	✓	✓	✓
P1507500	R	✓		✓
P1514541	R	✓		✓
P1521134	NR	✓	✓	✓
P1523714	R	✓		✓
P1532483	NR	✓	✓	✓
P1533236	NR	✓
P1535851	R	✓	✓	✓
P1536820	NR	✓	✓	✓
P1537208	R	✓		✓
P1543094	NR	✓	✓	✓
P1544991	NR	✓
P508227	NR	✓		✓
P956719	NR	✓	✓	✓
P9635119	R	✓
P9832950	NR	✓		✓

## Sheet: S2_MSI_ORR
Table S2. ORR of patients in sub-groups defined by MSI status.
	MSI-high Colorectal Cancer	Non MSI-high Colorectal Cancer	MSI-high Noncolorectal Cancer	MSI-high Gastric Cancer
Complete response	0	0	0	0
Partial response	4	0	4	3
Stable disease at Week 12	7	1	3	2
Progressive disease	7	0	1	1
Objective response rate*	0.22	0	0.5	0.5
* Complete response and partial response, according to Le et al.

## Sheet: S3_Drug
Tablel S3. Anti-PD-1 drugs used in this study have no effects on patient response or the gut microbial abundance.
A. Anti-PD-1 drugs used in the study and their association with clinical response						B. 20 most abundant genera and their association with anti-PD-1 drugs
Anti-PD-1/L1 Drugs	R	NR	P-value			Genus	p.value
Drug 1	6	3	0.2395			Bacteroides	0.592904
Drug 2	12	4				Prevotella_9	0.111152
Drug 3	9	6				Faecalibacterium	0.651803
Drug 4	2	0				Escherichia/Shigella	0.609875
Drug 5	8	7				Agathobacter	0.817236
Drug 6	5	7				Roseburia	0.853889
Drug 7	0	2				Lachnospira	0.853066
Drug 8	3	0				Ruminococcus_2	0.804156
						Lachnoclostridium	0.738757
						Bifidobacterium	0.291577
						Sutterella	0.304213
						Alistipes	0.0472677
						Ruminococcaceae_UCG-002	0.463761
						Klebsiella	0.928395
						Parabacteroides	0.146654
						Ruminococcus_1	0.878655
						Prevotella_2	0.279738
						Dialister	0.852879
						Lachnospiraceae_NK4A136_group	0.765579
						Ruminococcaceae_UCG-005	0.422775

## Sheet: S4_Gender
Table S4. Gender has no effects on the clinical response of anti-PD-1 immunotherapy.
	Gender	R	NR	P-value
All cancer types	F	13	8	1
	M	32	21
CRC	F	3	3	0.6169
	M	9	4
Gastric cancer	F	3	4	0.1819
	M	12	4
Esophageal carcinoma	F	2	0	0.4725
	M	6	6
Others	F	5	1	0.1516
	M	5	7

## Sheet: S5_DESeq2
Table S5. Differential analysis with DESeq2 on the 16S relative abundance of gut microbiome (N=74).
OUT	baseMean	log2FoldChange	lfcSE	stat	pvalue	padj	Kingdom	Phylum	Class	Order	Family	Genus	Response
OTU18|Dialister	197.238	2.15177	0.555562	3.87314	0.000107444	0.0177923	Bacteria	Firmicutes	Negativicutes	Selenomonadales	Veillonellaceae	Dialister	R
OTU25|Megamonas	130.564	-2.67328	0.692259	-3.86168	0.000112609	0.0177923	Bacteria	Firmicutes	Negativicutes	Selenomonadales	Veillonellaceae	Megamonas	NR
OTU49|Akkermansia	12.778	3.55918	1.29152	2.7558	0.00585481	0.311389	Bacteria	Verrucomicrobia	Verrucomicrobiae	Verrucomicrobiales	Akkermansiaceae	Akkermansia	R
OTU172|Ruminococcaceae_NK4A214_group	10.4472	-2.61743	1.14706	-2.28187	0.0224971	0.355454	Bacteria	Firmicutes	Clostridia	Clostridiales	Ruminococcaceae	Ruminococcaceae_NK4A214_group	NR
OTU217|CAG-352	3.12764	2.53932	1.05179	2.41428	0.0157665	0.311389	Bacteria	Firmicutes	Clostridia	Clostridiales	Ruminococcaceae	CAG-352	R
OTU239|Ruminococcaceae_UCG-010	2.75808	2.09493	1.0055	2.08348	0.0372075	0.461202	Bacteria	Firmicutes	Clostridia	Clostridiales	Ruminococcaceae	Ruminococcaceae_UCG-010	R
OTU280|Bacteroides	10.1047	2.35798	1.16327	2.02703	0.0426599	0.481447	Bacteria	Bacteroidetes	Bacteroidia	Bacteroidales	Bacteroidaceae	Bacteroides	R

## Sheet: S6_Omnibus_all
Table S6. Differentially abundant genera identified by the Omnibus test using 16S relative abundance of the gut microbiome of all 74 cancer patients.
	p.value	chi.stat	df	abund.baseline	prev.baseline	dispersion.baseline	abund.LFC.Response_3R.est	abund.LFC.Response_3R.se	prev.LOD.Response_3R.est	prev.LOD.Response_3R.se	dispersion.LFC.Response_3R.est	dispersion.LFC.Response_3R.se	method	Response
OTU185|Ruminococcaceae_UCG-002	0.00598586	12.4516	3	0.000143071	0.173732	44.8217	1.68419	0.385673	0.356921	0.604382	-3.94709	4.11624	omnibus	R
OTU217|CAG-352	0.0147336	10.504	3	5.5e-05	0.315077	0.676781	1.5233	0.469028	0.206676	0.506044	1.33867	0.777774	omnibus	R
OTU264|Prevotella_2	0.00258397	14.2499	3	0.00276416	0.697837	0.863648	1.35535	0.415908	-0.205785	0.511453	-1.07255	0.36041	omnibus	R
OTU18|Dialister	0.000569393	17.456	3	0.00158039	0.834498	1.12327	1.20032	0.306265	1.77683	0.978442	-1.01369	0.323109	omnibus	R
OTU77|Lachnospiraceae_UCG-001	0.0415879	8.22476	3	0.00066907	0.867837	1.80822	0.597289	0.212697	0.355565	0.745471	-0.466862	0.346802	omnibus	R
OTU216|Ruminiclostridium_5	0.0350091	8.60638	3	0.000186682	0.469345	1.89135	0.397047	0.230779	-0.0967932	0.477927	1.75086	0.717898	omnibus	R
OTU159|Lachnospira	0.0343622	8.64761	3	0.00342987	0.794784	1.39611	0.2711	0.222568	2.54369	1.16273	-0.110075	0.33255	omnibus	R
OTU222|Ruminococcus_2	0.0178376	10.0874	3	0.0119633	0.621959	1.01453	0.180798	0.357722	1.67229	0.623171	-1.09829	0.350401	omnibus	R
OTU196|Ruminiclostridium_9	0.00447417	13.0764	3	0.000479057	0.727676	3.08598	0.130991	0.239082	2.15975	0.856921	-1.64536	0.387754	omnibus	R
OTU295|Parabacteroides	0.0197232	9.86788	3	0.00183655	0.965934	2.14686	0.102756	0.158462	-2.21621	1.08096	0.570083	0.352644	omnibus	R
OTU221|Ruminococcus_2	7.91e-06	26.3888	3	0.00347575	0.828501	1.60719	-0.173818	0.203989	2.24793	1.14207	-0.0809801	0.338003	omnibus	NR
OTU183|Ruminococcaceae_UCG-002	0.0101955	11.303	3	0.00331688	0.979609	0.803272	-0.466241	0.247595	-1.16712	1.45078	0.551283	0.309936	omnibus	NR
OTU124|Hungatella	0.00510177	12.7949	3	0.000872126	0.552165	2.9333	-0.501676	0.34244	-1.26992	0.505725	-1.1333	0.541984	omnibus	NR
OTU282|Bacteroides	0.0035649	13.5628	3	0.0124147	0.999905	0.434747	-0.748544	0.326717	-7.34377	19.0572	0.766314	0.297904	omnibus	NR
OTU172|Ruminococcaceae_NK4A214_group	0.0317879	8.81962	3	0.000770195	0.418009	1.43182	-0.904251	0.328743	-0.770398	0.510309	0.344476	0.59626	omnibus	NR
OTU3|Catenibacterium	0.0424162	8.18096	3	0.000344188	0.18964	0.771987	-2.35727	0.614409	0.116255	0.599322	0.643925	1.12156	omnibus	NR

## Sheet: S7_Omnibus_CRC
Table S7. Differentially abundant genera identified by the Omnibus test using 16S relative abundance of the gut microbiome of colorectal cancer patients.
rowname	p.value	chi.stat	df	abund.baseline	prev.baseline	dispersion.baseline	abund.LFC.Response_3R.est	abund.LFC.Response_3R.se	prev.LOD.Response_3R.est	prev.LOD.Response_3R.se	dispersion.LFC.Response_3R.est	dispersion.LFC.Response_3R.se	method	Response	id
OTU104|Lachnoclostridium	0.0121608	10.921	3	0.000748989	0.862157	2.42619	2.12619	0.561134	12.8558	447.406	-1.95091	0.665163	omnibus	R	OTU104|Lachnoclostridium
OTU294|Parabacteroides	0.00371911	13.4722	3	0.000960724	0.714321	6.28767	2.04777	0.453846	0.263603	1.0787	-2.28183	0.790496	omnibus	R	OTU294|Parabacteroides
OTU293|Parabacteroides	0.0119999	10.9499	3	0.000433442	0.42858	47.4752	1.64936	0.536473	-1.32095	1.08763	-3.23996	2.37645	omnibus	R	OTU293|Parabacteroides
OTU155|Lachnospira	0.00100589	16.2538	3	0.000620953	0.428573	30.7116	1.63959	0.192513	-0.810941	1.01378	-0.54393	1.49648	omnibus	R	OTU155|Lachnospira
OTU187|Ruminococcaceae_UCG-005	0.0474631	7.93083	3	0.000160074	0.290084	5.15717	1.33695	0.427494	0.558534	1.0181	0.590696	2.13679	omnibus	R	OTU187|Ruminococcaceae_UCG-005
OTU197|Flavonifractor	0.000717327	16.9686	3	0.000775476	0.857146	16.602	1.32392	0.457135	0.194744	1.3973	-3.52867	0.846849	omnibus	R	OTU197|Flavonifractor
OTU18|Dialister	0.0184481	10.0139	3	0.00104926	0.714297	3.77355	1.19206	0.537196	9.02214	41.575	-2.34155	0.738548	omnibus	R	OTU18|Dialister
OTU190|Ruminococcaceae_UCG-005	0.00785104	11.8675	3	0.00058805	0.571432	32.5053	1.10066	0.240007	0.811626	1.01389	-2.54147	1.43285	omnibus	R	OTU190|Ruminococcaceae_UCG-005
OTU77|Lachnospiraceae_UCG-001	0.00908739	11.5518	3	0.000240258	1	11.1839	1.02295	0.307772	-17.0205	NA	-2.10299	0.970695	omnibus	R	OTU77|Lachnospiraceae_UCG-001
OTU103|Lachnospiraceae_AC2044_group	0.00518239	12.7613	3	0.000243488	0.714287	48.7711	0.990173	0.624023	-1.96278	1.06454	-3.97241	3.53194	omnibus	R	OTU103|Lachnospiraceae_AC2044_group
OTU271|Bacteroides	0.0267157	9.20255	3	0.00073664	1	2.16362	0.602092	0.456182	-19.0143	NA	-0.578417	0.762123	omnibus	R	OTU271|Bacteroides
OTU221|Ruminococcus_2	0.0166494	10.2378	3	0.00172779	0.591753	0.750394	0.508402	0.597362	19.3426	5131.03	1.20833	0.757509	omnibus	R	OTU221|Ruminococcus_2
OTU188|Ruminococcaceae_UCG-005	0.0051568	12.7719	3	0.000489623	0.714286	5135920000000	0.42055	0.296572	-0.911502	1.01655	-28.5052	1277.9	omnibus	R	OTU188|Ruminococcaceae_UCG-005
OTU274|Bacteroides	0.0474156	7.93306	3	0.000781412	1	4.38965	-0.313822	0.367961	-16.1096	1533.97	-1.07635	0.79001	omnibus	NR	OTU274|Bacteroides
OTU319|Odoribacter	0.00953251	11.4484	3	0.000439606	0.861583	2.92866	-0.922611	0.286084	-1.48133	1.24158	2.32751	2.37813	omnibus	NR	OTU319|Odoribacter
OTU176|Oscillibacter	0.0391078	8.3612	3	0.000882771	0.775026	0.710921	-0.962828	0.545943	0.39947	1.19597	1.59131	0.774824	omnibus	NR	OTU176|Oscillibacter
OTU201|Bifidobacterium	0.0026822	14.1704	3	0.00248319	0.571433	4.21308	-0.980479	0.269884	0.810912	1.01381	1.10406	0.934038	omnibus	NR	OTU201|Bifidobacterium
OTU52|Lachnoclostridium	0.0030755	13.8784	3	0.00537552	1	1.0531	-1.01728	0.39455	-20.6799	703.605	1.54335	0.645276	omnibus	NR	OTU52|Lachnoclostridium
OTU61|Subdoligranulum	0.00449992	13.0641	3	0.00418867	0.862906	1.01368	-1.07742	0.429179	0.558412	1.51618	1.55768	0.681301	omnibus	NR	OTU61|Subdoligranulum
OTU57|Subdoligranulum	0.000308309	18.7475	3	0.00192152	0.783665	0.478762	-1.26628	0.632812	1.1173	1.39272	2.53674	0.73898	omnibus	NR	OTU57|Subdoligranulum
OTU228|Coprococcus_2	0.0125974	10.8445	3	0.0037098	0.428573	5.51936	-1.71634	0.328292	-0.810928	1.01378	0.664126	1.41087	omnibus	NR	OTU228|Coprococcus_2
OTU304|Parabacteroides	0.0109244	11.1535	3	0.00134828	0.571529	2.74482	-1.85996	0.403668	-0.967753	0.978108	0.650553	1.1921	omnibus	NR	OTU304|Parabacteroides
OTU282|Bacteroides	0.000352839	18.4639	3	0.127129	1	0.256813	-3.52025	0.805087	-13.8491	742.634	1.45033	0.578666	omnibus	NR	OTU282|Bacteroides

## Sheet: S8_Omnibus_EC
Table S8. Differentially abundant genera identified by the Omnibus test using 16S relative abundance of the gut microbiome of esophageal carcinoma cancer patients.
rowname	p.value	chi.stat	df	abund.baseline	prev.baseline	dispersion.baseline	abund.LFC.Response_3R.est	abund.LFC.Response_3R.se	prev.LOD.Response_3R.est	prev.LOD.Response_3R.se	dispersion.LFC.Response_3R.est	dispersion.LFC.Response_3R.se	method	Response	id
OTU261|Prevotella_9	0.000447029	17.9659	3	0.00190348	0.833333	5.7242	2.78193	0.481466	20.3662	12080.5	-2.18262	0.784509	omnibus	R	OTU261|Prevotella_9
OTU18|Dialister	0.0226542	9.56457	3	0.00120873	0.691535	0.86296	2.48705	0.690534	16.6721	2239.48	-0.276758	0.781934	omnibus	R	OTU18|Dialister
OTU97|Lachnospiraceae_NK4A136_group	0.0419349	8.20631	3	0.000132633	0.668741	0.588379	2.04523	0.811615	22.1025	26220.9	0.278364	0.946934	omnibus	R	OTU97|Lachnospiraceae_NK4A136_group
OTU222|Ruminococcus_2	0.0145401	10.5328	3	0.00588584	0.499999	8.94822	1.83789	0.786485	1.82092	1.30739	-3.57596	0.943521	omnibus	R	OTU222|Ruminococcus_2
OTU266|Bacteroides	0.0404353	8.28715	3	0.00709031	1	1.50754	1.68625	0.546909	-13.7857	1451.15	-0.690211	0.702368	omnibus	R	OTU266|Bacteroides
OTU207|Parasutterella	0.0365825	8.5091	3	0.00333037	1	1.78198	1.46892	0.704887	-13.0039	1464.01	-1.71695	0.694012	omnibus	R	OTU207|Parasutterella
OTU1|Phascolarctobacterium	0.0230262	9.52888	3	0.000587277	0.833583	6.02956	1.41381	0.660212	0.316172	1.52603	-2.80237	0.980914	omnibus	R	OTU1|Phascolarctobacterium
OTU277|Bacteroides	0.00645318	12.2899	3	0.00419199	0.833333	11.5665	1.0037	0.379819	22.6125	NA	-2.4522	0.818562	omnibus	R	OTU277|Bacteroides
OTU105|Lachnospiraceae_UCG-004	0.0107026	11.1979	3	0.00114747	0.833334	4.82134	0.986508	0.252173	0.336469	1.53069	0.69582	0.900265	omnibus	R	OTU105|Lachnospiraceae_UCG-004
OTU128|Lachnospiraceae_NK4A136_group	0.0226369	9.56625	3	0.00315353	0.500005	3.75574	0.792268	0.324139	1.9459	1.34527	1.06164	0.987554	omnibus	R	OTU128|Lachnospiraceae_NK4A136_group
OTU308|Paraprevotella	0.0308329	8.88691	3	0.00124211	0.500003	339.933	0.465842	0.59512	0.0803787	1.0805	-6.18116	7.19348	omnibus	R	OTU308|Paraprevotella
OTU158|Lachnospira	0.0034382	13.6402	3	0.00369815	0.166666	436959320	-0.714436	0.207414	3.5564	1.53108	-18.5155	394.157	omnibus	NR	OTU158|Lachnospira
OTU153|Lachnospira	0.0152871	10.4238	3	0.010274	1	0.454151	-1.40788	0.64806	-13.7928	1268.51	1.83189	0.706875	omnibus	NR	OTU153|Lachnospira
OTU172|Ruminococcaceae_NK4A214_group	0.0119011	10.9678	3	0.00176525	0.66669	3.1913	-1.53208	0.336281	-1.20341	1.13282	2.03963	1.85308	omnibus	NR	OTU172|Ruminococcaceae_NK4A214_group
OTU183|Ruminococcaceae_UCG-002	0.0071341	12.0739	3	0.019998	1	0.658762	-1.59608	0.546907	-13.8162	864.274	1.57442	0.715028	omnibus	NR	OTU183|Ruminococcaceae_UCG-002
OTU274|Bacteroides	0.00428811	13.1675	3	0.00539582	0.995153	0.158626	-1.75842	1.05539	-3.37726	5.97499	2.83881	0.785119	omnibus	NR	OTU274|Bacteroides
OTU113|Marvinbryantia	0.0429134	8.15506	3	0.00356741	1	0.763308	-1.76836	0.56342	-13.5195	874.832	0.662826	0.745736	omnibus	NR	OTU113|Marvinbryantia
OTU124|Hungatella	0.011647	11.0146	3	0.00210203	0.833429	2.64033	-1.79754	0.439539	-2.10643	1.3161	0.292744	1.13604	omnibus	NR	OTU124|Hungatella
OTU131|Clostridium_sensu_stricto_1	0.0116332	11.0172	3	0.00903187	0.836751	0.931834	-1.83949	0.546806	17.5528	5205.85	0.499816	0.733942	omnibus	NR	OTU131|Clostridium_sensu_stricto_1
OTU35|Lactobacillus	0.0391957	8.35622	3	0.000913823	0.628406	0.345077	-1.86918	0.90546	-1.00304	1.11481	16.2927	NA	omnibus	NR	OTU35|Lactobacillus
OTU271|Bacteroides	0.000310779	18.7307	3	0.00411102	1	0.787115	-2.47656	0.488909	-18.3786	NA	3.42387	2.0418	omnibus	NR	OTU271|Bacteroides

## Sheet: S9_Omnibus_GC
Table S9. Differentially abundant genera identified by the Omnibus test using 16S relative abundance of the gut microbiome of gastric cancer patients.
rowname	p.value	chi.stat	df	abund.baseline	prev.baseline	dispersion.baseline	abund.LFC.Response_3R.est	abund.LFC.Response_3R.se	prev.LOD.Response_3R.est	prev.LOD.Response_3R.se	dispersion.LFC.Response_3R.est	dispersion.LFC.Response_3R.se	method	Response
OTU263|Prevotella_9	0.000107217	20.9618	3	0.00116693	0.750002	8.48252	3.01891	0.569755	-0.149009	0.999079	-3.32361	0.790889	omnibus	R
OTU202|Bifidobacterium	0.00753013	11.9575	3	0.00142855	1	1.05517	1.95627	0.586606	-14.1322	NA	-1.01901	0.573494	omnibus	R
OTU264|Prevotella_2	0.049197	7.85084	3	0.00283296	0.500064	2.13767	1.76489	0.803229	1.36492	0.954723	-2.59828	0.767767	omnibus	R
OTU156|Lachnospira	0.040443	8.28673	3	0.00126565	0.625472	2.26956	1.07369	0.428917	2.41252	1.38334	-1.09986	0.691456	omnibus	R
OTU274|Bacteroides	0.0117617	10.9934	3	0.000455715	0.625134	5.92112	0.870404	0.392348	7.63786	15.2172	-2.28415	0.797364	omnibus	R
OTU190|Ruminococcaceae_UCG-005	0.0155238	10.3903	3	0.00137081	0.625012	8.99983	0.796579	0.334453	1.41656	1.06517	-2.31824	0.773964	omnibus	R
OTU79|Agathobacter	0.0377011	8.4424	3	0.00830351	0.75	2.88201	0.671844	0.301284	18.9409	5617.53	-0.342121	0.649139	omnibus	R
OTU275|Bacteroides	0.0354734	8.57723	3	0.000673804	0.625001	169.902	0.35471	0.230976	-0.376639	0.895107	-4.11283	3.21067	omnibus	R
OTU281|Bacteroides	0.0431875	8.14091	3	0.00118823	0.915977	0.782173	-0.683338	0.45328	-1.37512	1.40201	1.47967	0.655865	omnibus	NR
OTU147|Agathobacter	0.0461599	7.99284	3	0.000675848	0.500158	3.76523	-0.774959	0.299769	0.405751	0.881949	0.929112	0.989733	omnibus	NR
OTU201|Bifidobacterium	0.0491318	7.8538	3	0.0115942	0.690043	0.155189	-0.983084	1.11917	-0.933405	0.923202	2.39321	0.74236	omnibus	NR
OTU76|Lachnospiraceae_UCG-001	0.00202479	14.7693	3	0.00136744	0.633359	1.07063	-1.03531	0.442353	-1.55826	0.937658	4.91545	3.66035	omnibus	NR
OTU312|Butyricimonas	0.0346134	8.63151	3	0.00125735	0.250002	5.86087	-1.50504	0.371328	0.0877936	1.00369	0.264966	1.41394	omnibus	NR
OTU25|Megamonas	0.040222	8.29889	3	0.00258854	0.999051	0.198299	-1.90356	0.879168	7.23366	312.317	0.891915	0.580076	omnibus	NR

## Sheet: S10_MGS_diff_species
Table S10. Differentially abundant species identified by metagenomics sequencing. P value was calculated with Wilcoxon test on the relative abundance.
Species	Pvalue	Padj	Group
Lactobacillus_curvatus	0.0349915	0.983111	NR
Catenibacterium_mitsuokai	0.0349915	0.983111	NR
Dialister_succinatiphilus	0.0349915	0.983111	NR
Yersinia_unclassified	0.0349915	0.983111	NR
Rothia_dentocariosa	0.0323406	0.510947	R
Parabacteroides_distasonis	0.0185461	0.510947	R
Granulicatella_unclassified	0.0185767	0.510947	R
Lactobacillus_mucosae	0.00778013	0.510947	R
Streptococcus_anginosus	0.00469467	0.510947	R
Streptococcus_sanguinis	0.0379282	0.510947	R
Streptococcus_vestibularis	0.0376146	0.510947	R
Clostridium_perfringens	0.0256792	0.510947	R
Eubacterium_ramulus	0.0372004	0.510947	R
Eubacterium_rectale	0.00076866	0.255963	R
Coprococcus_catus	0.0354028	0.510947	R
Dorea_longicatena	0.0388083	0.510947	R
Erysipelotrichaceae_bacterium_6_1_45	0.0427763	0.510947	R
Akkermansia_muciniphila	0.016836	0.510947	R

[truncated: 2 more sheets: S11_MGS_diff_pathways, S12_ElasticNetFeatures]
